# Supplementary material for: Characterization of a Novel Conus bandanus Conopeptide Belonging to the M-Superfamily Containing Bromotryptophan
Source: MDPI journal article supplement (doi:10.3390/md12063449), 2014-06-05

## Supplementary Information

**Figure S1.** The MALDI-TOF spectra of the fraction “3.2” highlighted in black in Figure 1B.

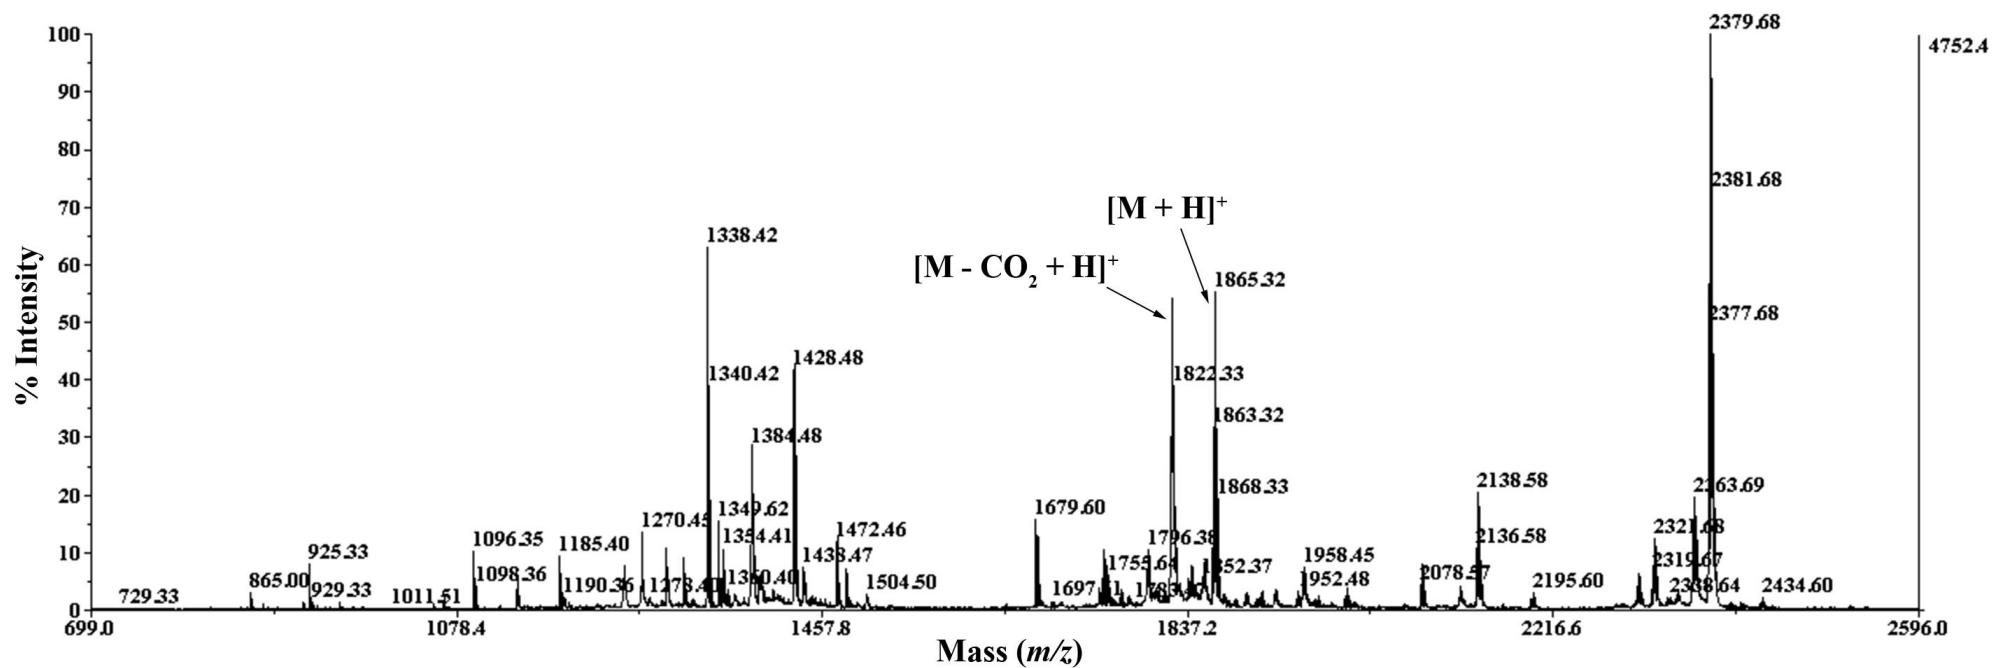

Supplement: s1 [file s1]
